# Supplementary material for: A Method for Estimating Urban Background Concentrations in Support of Hybrid Air Pollution Modeling for Environmental Health Studies
Source: MDPI journal article supplement (doi:10.3390/ijerph111010518), 2014-10-15
Supplement: s1 [file s1]

# A Method for Estimating Urban Background Concentrations in Support of Hybrid Air Pollution Modeling for Environmental Health Studies

## 1. The 64 Unique Monitoring Locations Used in This Study for Estimating Background Concentrations

**Table S1.** AQS sites used in the STOK estimation, along with monitor objective (background sites shown in red).

| Name                        | State | AIRS-ID   | NO <sub>x</sub> | PM <sub>2.5</sub> | Both | Monitor Objective          |
|-----------------------------|-------|-----------|-----------------|-------------------|------|----------------------------|
| Pittsboro Elementary School | IN    | 180630002 | ✓               |                   |      | Highest Concentration      |
| Old Ammunition Bunker       | IN    | 180890022 | ✓               |                   |      | Highest Concentration      |
| Naval Avionics Center       | IN    | 180970073 | ✓               |                   |      | Population Exposure        |
| Washington Park             | IN    | 180970078 |                 | ✓                 |      | Population Exposure        |
| Ernie Pyle School           | IN    | 180970081 |                 | ✓                 |      | Population Exposure        |
| South Bend - Shields Dr.    | IN    | 181410015 | ✓               |                   |      | Population Exposure        |
| Fire Station #17            | IN    | 181630012 | ✓               |                   |      | Highest Concentration      |
| Evansville- Buena Vista     | IN    | 181630021 | ✓               |                   |      | Highest Concentration      |
| McLean High School          | IN    | 181670018 |                 | ✓                 |      | Unknown                    |
| Bay City                    | MI    | 260170014 |                 | ✓                 |      | Unknown                    |
| Whaley Park                 | MI    | 260490021 |                 | ✓                 |      | General Background         |
| Lansing                     | MI    | 260650012 |                 |                   | ✓    | Unknown                    |
| Kalamazoo Fairgrounds       | MI    | 260770008 |                 | ✓                 |      | Population Exposure        |
| GR-Monroe                   | MI    | 260810020 |                 | ✓                 |      | Population Exposure        |
| Tecumseh                    | MI    | 260910007 |                 | ✓                 |      | General Background         |
| Houghton Lake               | MI    | 261130001 |                 |                   | ✓    | Unknown/General Background |
| Port Huron                  | MI    | 261470005 |                 | ✓                 |      | General Background         |
| Seney                       | MI    | 261530001 |                 | ✓                 |      | General Background         |
| Ypsilanti                   | MI    | 261610008 |                 | ✓                 |      | Population Exposure        |
| Allen Park                  | MI    | 261630001 |                 | ✓                 |      | Population Exposure        |
| East 7 Mile                 | MI    | 261630019 | ✓               |                   |      | Unknown                    |
| Dearborn Public Schools     | MI    | 261630033 |                 | ✓                 |      | Unknown                    |
| Newberry School             | MI    | 261630038 |                 | ✓                 |      | Unknown                    |
| FIA/Lafayette               | MI    | 261630039 |                 | ✓                 |      | Unknown                    |
| Adams                       | OH    | 390010001 |                 | ✓                 |      | Unknown                    |
| Lima Bath                   | OH    | 390030009 |                 | ✓                 |      | Unknown                    |
| Athens                      | OH    | 390090004 | ✓               |                   |      | Regional Transport         |
| Hook Field Airport          | OH    | 390171004 |                 | ✓                 |      | Population Exposure        |
| Springfield Firehouse       | OH    | 390230005 |                 | ✓                 |      | Unknown                    |
| GT CRAIG                    | OH    | 390350060 | ✓               |                   |      | Population Exposure        |
| New Albany                  | OH    | 390490029 |                 | ✓                 |      | Unknown                    |

**Table S1.** *Cont.*

| Name                       | State | AIRS-ID   | NO <sub>x</sub> | PM <sub>2.5</sub> | Both | Monitor Objective   |
|----------------------------|-------|-----------|-----------------|-------------------|------|---------------------|
| Columbus State Fairgrounds | OH    | 390490034 |                 | ✓                 |      | Unknown             |
| Yellow Springs             | OH    | 390570005 |                 | ✓                 |      | Unknown             |
| Sycamore                   | OH    | 390610006 |                 | ✓                 |      | Unknown             |
| Steuben                    | OH    | 390810017 |                 | ✓                 |      | Source Oriented     |
| Odont                      | OH    | 390870012 |                 | ✓                 |      | Population Exposure |
| Erie                       | OH    | 390950024 |                 | ✓                 |      | Unknown             |
| Youngstown                 | OH    | 390990014 |                 | ✓                 |      | General Background  |
| Chippewa                   | OH    | 391030004 | ✓               |                   |      | Upwind Background   |
| Dayton Public Library      | OH    | 391130032 |                 | ✓                 |      | Population Exposure |
| National Trail School      | OH    | 391351001 |                 | ✓                 |      | Regional Transport  |
| Health Dept.               | OH    | 391510020 |                 | ✓                 |      | Population Exposure |
| Laird                      | OH    | 391550005 |                 | ✓                 |      | Unknown             |
| Lebanon                    | OH    | 391650007 |                 | ✓                 |      | Unknown             |
| Narsto Site Arendtsville   | PA    | 420010001 |                 |                   | ✓    | Extreme Downwind    |
| Lawrenceville              | PA    | 420030008 |                 |                   | ✓    | Population Exposure |
| Carnegie Science Center    | PA    | 420030010 | ✓               |                   |      | Population Exposure |
| South Allegheny School     | PA    | 420030064 |                 | ✓                 |      | Population Exposure |
| Harrison                   | PA    | 420031005 | ✓               |                   |      | Population Exposure |
| Kittanning                 | PA    | 420050001 |                 | ✓                 |      | Unknown             |
| Beaver Falls               | PA    | 420070014 | ✓               |                   |      | Population Exposure |
| Reading Airport            | PA    | 420110011 | ✓               |                   |      | Population Exposure |
| Bristol                    | PA    | 420170012 | ✓               |                   |      | Population Exposure |
| Johnstown                  | PA    | 420210011 | ✓               |                   |      | Population Exposure |
| State College (PSU)        | PA    | 420270100 | ✓               |                   |      | Population Exposure |
| Harrisburg                 | PA    | 420430401 | ✓               |                   |      | Population Exposure |
| Chester                    | PA    | 420450002 | ✓               |                   |      | Population Exposure |
| Marne                      | PA    | 420490003 | ✓               |                   |      | Population Exposure |
| Scranton                   | PA    | 420692006 | ✓               |                   |      | Population Exposure |
| Lancaster                  | PA    | 420710007 | ✓               |                   |      | Population Exposure |
| Freemansburg               | PA    | 420950025 |                 |                   | ✓    | Population Exposure |
| Perry County               | PA    | 420990301 | ✓               |                   |      | General Background  |
| Charleroi                  | PA    | 421250005 | ✓               |                   |      | Population Exposure |
| York                       | PA    | 421330008 | ✓               |                   |      | Population Exposure |

Note: \* Houghton Lake is designated background for PM<sub>2.5</sub> but not for NO<sub>x</sub>.

## 2. The Covariance Model, and the Two Components for Each of NO<sub>x</sub> and PM<sub>2.5</sub>

In this work, we developed the geostatistical framework for the space/time estimation of ambient concentration of air pollutants. Because of its ability to produce not only the estimate at unmonitored locations but also the uncertainty associated with the estimate, the geostatistical method known as kriging has been widely used in air quality studies. Here, we employed the method of space/time ordinary kriging (STOK) with measurement error to estimate the ambient concentration at any unmonitored location in the study area.

The space/time dependency of each air quality parameter was characterized by the means of its covariance function (covariogram). We assumed that each air quality parameter had a constant global offset given by the simple arithmetic average of all the observations in the study domain, and that the residuals obtained by subtracting this constant global offset from the observations were isotropic and homogeneous-stationary. The latter assumption implies that the space/time covariance function of the residuals depends solely on the spatial and temporal distance between two space/time points.

The space/time sample covariance function of the residual concentrations was modeled by the method-of-moments estimator  $\hat{C}$  at various spatial lag  $r$  and temporal lag  $\tau$ . The sample covariance function was then used to fit a positive-definite covariance model. In this work, we used the space/time separable two-component exponential covariance model defined as

$$C(r, \tau) = C_1 \exp\left(-\frac{3r}{a_{r1}}\right) \exp\left(-\frac{3\tau}{a_{\tau1}}\right) + C_2 \exp\left(-\frac{3r}{a_{r2}}\right) \exp\left(-\frac{3\tau}{a_{\tau2}}\right)$$

where  $C_1$  and  $C_2$  are the sill parameters quantifying the variability of observations,  $a_{r1}$  and  $a_{r2}$  are spatial ranges, and  $a_{\tau1}$  and  $a_{\tau2}$  are temporal ranges for the 1<sup>st</sup> and 2<sup>nd</sup> components. The range parameter characterizes the extent of the influence of spatial and temporal autocorrelation and is given by the separation distance at which the covariance decreases to 5% of the sill. First we obtained the spatial component of the sample covariance function at temporal lag  $\tau = 0$  and the temporal component at spatial lag  $r = 0$ . These sample covariance functions were then used to fit the model. All covariance model parameters were estimated by an automated weighted least squares procedure. Table S2 shows the estimated parameters of the space/time separable two-component exponential covariance model defined by the above equation.

**Table S2.** Covariance model parameter for PM<sub>2.5</sub> and NO<sub>x</sub> obtained by the weighted least squares method.  $C_1$  and  $C_2$  are the sill parameter,  $a_{r1}$  and  $a_{r2}$  are spatial range, and  $a_{\tau1}$  and  $a_{\tau2}$  are temporal range for the 1<sup>st</sup> and 2<sup>nd</sup> component, respectively.

| Pollutant         | 1st Component |          |             | 2nd Component |          |             |
|-------------------|---------------|----------|-------------|---------------|----------|-------------|
|                   | $C_1$         | $a_{r1}$ | $a_{\tau1}$ | $C_2$         | $a_{r2}$ | $a_{\tau2}$ |
| PM <sub>2.5</sub> | 69.2728       | 1.2044   | 0.83387     | 34.5523       | 62.5145  | 24.3498     |
| NO <sub>x</sub>   | 214.1213      | 1.3139   | 0.73731     | 48.5727       | 693.0062 | 765.778     |

The STOK with measurement error method was employed to obtain the estimate and associated estimation variance at each estimation point. The STOK estimate is given by the linear combination of nearby samples. The kriging weights are obtained by minimizing the estimation mean square error subject to the unbiasedness constraint. In this study, we used 50 nearby samples that were observed within five temporal units (days or hours) from the estimation time. Nearby samples were selected based on the space/time distance defined as

$$(\text{space/time distance}) = (\text{spatial distance}) + ((\text{space/time metric}) \times (\text{temporal distance}))$$

where (space/time metric) is the ratio of the spatial covariance range and temporal covariance range. The STOK with measurement error method was implemented in the Matlab R2012a (MathWorks Inc., Natick, MA, USA) and *BMElib* libraries for modern spatiotemporal geostatistics.

### 3. Background Concentrations for NEXUS

**Figure S1.** Distribution of observations with background monitor objectives, soft data mean from nonbackground monitors, and STOK estimation for  $\text{NO}_x$  (left) and  $\text{PM}_{2.5}$  (right) for Detroit 30-km  $\times$  20-km grid of receptors with outliers removed (showing median as red line, 25th and 75th percentiles as ends of the boxes, and 5th and 95th percentiles as whiskers).

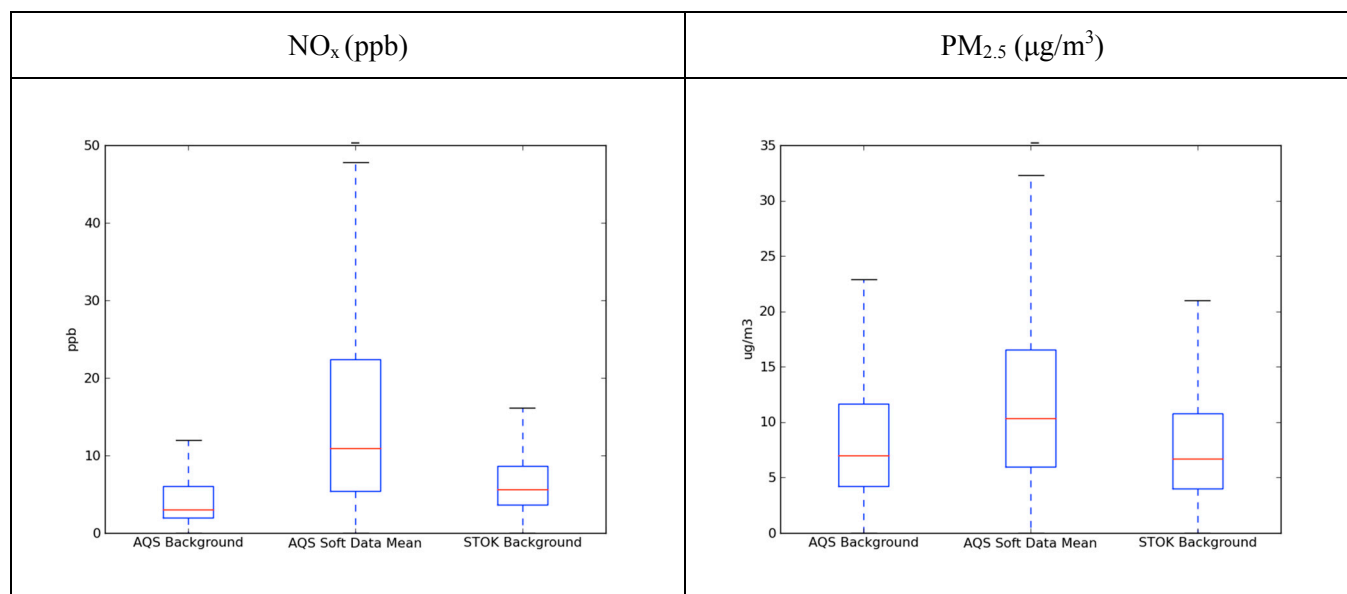

**Figure S2.** Estimated  $\text{NO}_x$  and  $\text{PM}_{2.5}$  background concentrations using STOK for the NEXUS study locations.

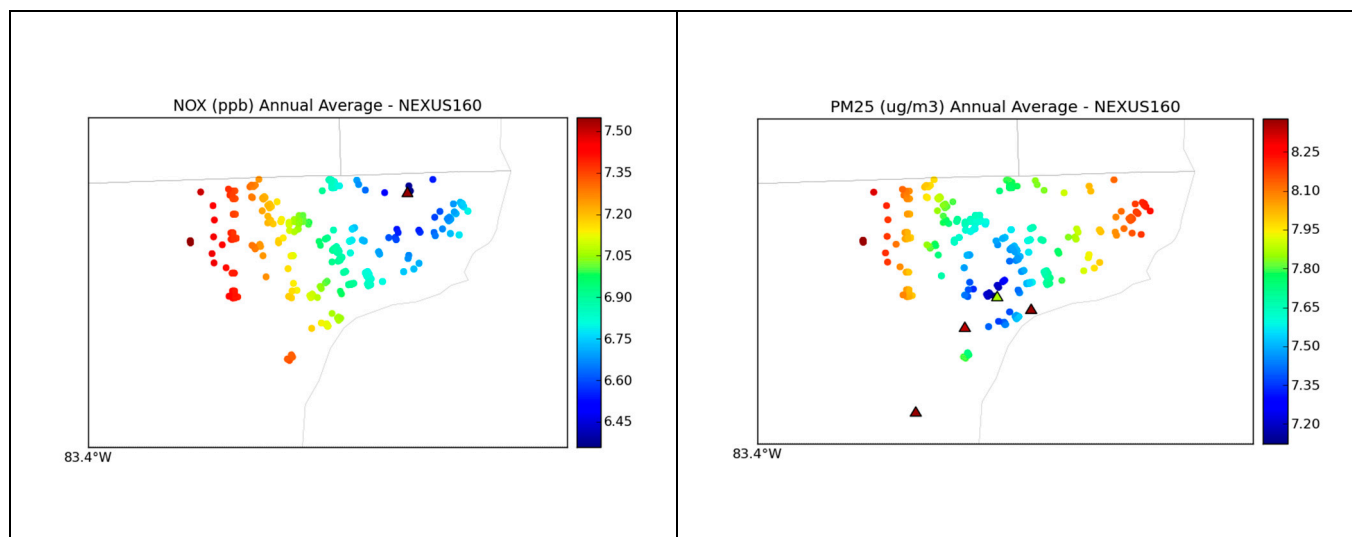

### 4. STOK Method Validation

A challenging aspect of our work is that urban background concentrations can seldom be measured directly, because it would require shutting down the urban local sources so that the background concentration with local sources zeroed out could be measured. As a result the hard data on background concentrations are usually only available away from the local sources, which lack the specificity needed to conduct a traditional validation analysis within the urban area of interest.

To examine this issue, we attempted to perform a validation analysis using a validation dataset consisting of measurements obtained at sites located outside of Detroit and with a background monitoring objective (two sites for NO<sub>x</sub> and six sites for PM<sub>2.5</sub>, as identified in Table S1, and shown in Figure 2). We implemented two methods, where we exclude the validation background sites and only utilize non-background sites as the training dataset for estimation.

1. The “Old Method” consists of using non-background sites as hard data, thus not employing the CMAQ-based  $R_{ZeroOut/Total}$ , and
2. The “New Method” which consists of using soft data at the non-background site locations. The latter method employs both observations at non-background sites and the CMAQ-based  $R_{ZeroOut/Total}$ .

Both methods estimate hourly background concentrations for 2010 for PM<sub>2.5</sub> and NO<sub>x</sub>. Table S3 shows statistical metrics that compare both methods to observations.

**Table S3.** Statistical metrics comparing observed measurements at background sites against STOK estimates using only non-background sites as hard data points (Old Method) and using only soft data from non-background sites (New Method) for NO<sub>x</sub> and PM<sub>2.5</sub> for 2010 (Units are in ppb for NO<sub>x</sub> and µg/m<sup>3</sup> for PM<sub>2.5</sub> for means and % for all error statistics).

| Metric                  | NO <sub>x</sub> |            | PM <sub>2.5</sub> |            |
|-------------------------|-----------------|------------|-------------------|------------|
|                         | Old Method      | New Method | Old Method        | New Method |
| Observed Mean           | 4.41            | 4.41       | 8.96              | 8.96       |
| Model Mean              | 28.38           | 12.14      | 10.25             | 9.71       |
| Mean Error              | 23.97           | 7.73       | 1.29              | 0.74       |
| Mean Absolute Error     | 24.02           | 8.52       | 3.14              | 3.17       |
| Root Mean Squared Error | 37.23           | 11.93      | 4.81              | 4.92       |
| FAC2 *                  | 6%              | 22%        | 83%               | 83%        |

Note: \* FAC2 represents the percent of concentrations estimates within a factor of two of observations.

NO<sub>x</sub> results show ~60% reduction of the model mean from the old to the new method. This translates to a general improvement of NO<sub>x</sub> model performance as seen by our metrics shown in Table S3. For instance we see that the Old Method has a large positive Mean Error +23.97%, and this Mean Error reduces to +7.73% for the New Method, which demonstrates that the large over prediction of the Old Method (which does not correct for double counting) is reduced in the New Method (which corrects for double counting). Likewise we see a reduction of the Mean Absolute Error and a reduction in the Root Mean Square Error between the Old and New Methods, demonstrating that on average the New Method is successful at reducing the absolute and the squared error compared to the Old Method. Another measure of goodness is the FAC2, which is the coverage of observed values by a factor of 2 around the estimated values. The FAC2 increases from 6% to 22%, demonstrating a substantial improvement from the Old to the New Method.

PM<sub>2.5</sub>, on the other hand, shows a model mean reduction of only ~5%, and even though model performance is far better for PM<sub>2.5</sub> (compared to NO<sub>x</sub>), the same improvement is not seen when comparing the two methods. It shows a negligible model performance difference between methods across most metrics. Hence overall, our validation analysis shows that the New Method is better than the Old Method for NO<sub>x</sub>, but in the case of PM<sub>2.5</sub> the difference is too close to be conclusive.

This behavior confirms that, in the case of PM<sub>2.5</sub>, our validation dataset lacks the specificity needed to conduct a traditional validation analysis within the urban area of interest. The difference in the specificity of the validation data between NO<sub>x</sub> and PM<sub>2.5</sub> can be attributed to the difference in the spatial ranges of their covariance models. As shown in Table S2, PM<sub>2.5</sub> has spatial range components ( $a_{r1}$ ,  $a_{r2}$ ) of 1.2 km and 62 km. This means that the PM<sub>2.5</sub> validation background stations need to be within 62 km of Detroit if they are to see an influence from the training data points located in Detroit. These training data points are treated as hard by the Old Method (thereby not correcting for double counting), whereas in the New Method they are treated as soft data with a CMAQ-based correction factor of  $R_{ZeroOut/Total}$ . Since the PM<sub>2.5</sub> validation background stations are outside the range of influence of the local sources, they lack the specificity needed to distinguish between the New and Old Methods. NO<sub>x</sub>, on the other hand, has spatial range components of 1.3 km and 693 km. Since there are NO<sub>x</sub> validation background stations that fall within 693 km of Detroit, these validation stations provide data with the specificity needed to distinguish between the new and old methods.

In conclusion, our validation shows how method 2 (New Method) improves NO<sub>x</sub> estimation compared to method 1 (Old Method) because the NO<sub>x</sub> validation background stations were specific enough to Detroit (e.g., within the NO<sub>x</sub> covariance range of 693 km). On the other hand a limitation of our study is that it lacks PM<sub>2.5</sub> background stations that are specific enough to Detroit to distinguish method 1 from method 2 (*i.e.*, the PM<sub>2.5</sub> background stations were all outside the covariance range of 62 km around Detroit). As a result the validation is not able to assess what would be the improvement in estimation accuracy for PM<sub>2.5</sub> background concentrations if we were able to measure PM<sub>2.5</sub> background concentrations close to Detroit. To truly measure background at Detroit we would have to shut down local sources in the city, which would be a difficult, and in many cases, unethical task. Thus, we choose the path of comparing hybrid estimation (by combining local-scale dispersion model results with estimated background) against observations in the urban monitors in Detroit.
